# Supplementary material for: Assessing impacts of coastal warming, acidification, and deoxygenation on Pacific oyster ( Crassostrea gigas ) farming: a case study in the Hinase area, Okayama Prefecture, and Shizugawa Bay, Miyagi Prefecture, Japan
Source: Copernicus journal article supplement (doi:10.5194/bg-20-4527-2023), 2023-11-24
Supplement: Supplementary file 1 [file bg-20-4527-2023-supplement.pdf]

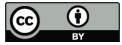

*Supplement of*

**Assessing impacts of coastal warming, acidification, and deoxygenation on Pacific oyster (*Crassostrea gigas*) farming: a case study in the Hinase area, Okayama Prefecture, and Shizugawa Bay, Miyagi Prefecture, Japan**

**Masahiko Fujii et al.**

*Correspondence to:* Masahiko Fujii (mfujii@aori.u-tokyo.ac.jp)

The copyright of individual parts of the supplement might differ from the article licence.

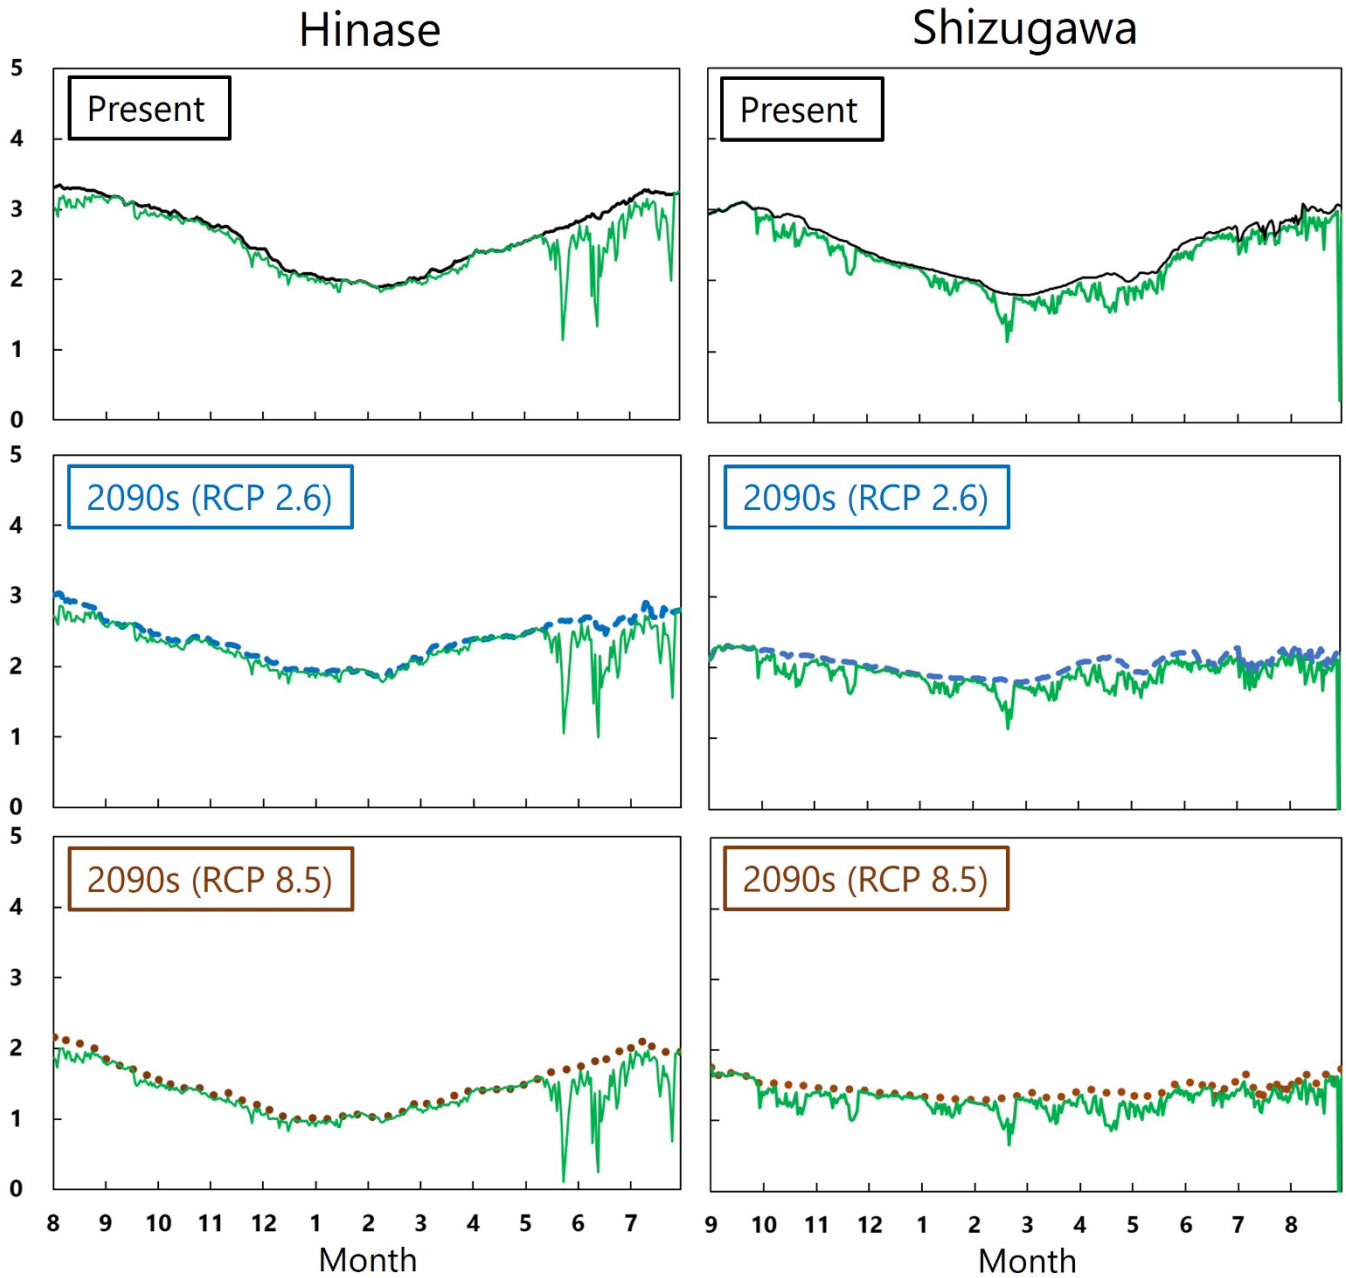

Figure S1. Simulated or projected  $\Omega_{arag}$  in Hinase from August to July (left) and in Shizugawa from September to August (right) for the present (top), for the 2090s with the RCP 2.6 scenario (middle), and for the 2090s with the RCP 8.5 scenario (bottom). Solid black lines, dashed blue lines, and dotted brown lines are identical to results shown in Figures 15(g) and 16(g). Solid green lines denote modeled daily  $\Omega_{arag}$  minima if present day observed daily  $\Omega_{arag}$  fluctuations are included.
